1 **Wastewater surveillance of influenza activity: Early detection,**  
2 **surveillance, and subtyping in city and neighbourhood communities**

3 Elisabeth Mercier<sup>1</sup>, Patrick M. D' Aoust<sup>1</sup>, Ocean Thakali<sup>1</sup>, Nada Hegazy<sup>1</sup>, Jian-Jun Jia<sup>1</sup>, Zhihao Zhang<sup>1</sup>, Walaa Eid<sup>2</sup>,  
4 Julio Plaza-Diaz<sup>2</sup>, Pervez Kabir<sup>1</sup>, Wanting Fang<sup>1</sup>, Aaron Cowan<sup>1</sup>, Sean E. Stephenson<sup>2</sup>, Lakshmi Pisharody<sup>1</sup>, Alex E.  
5 MacKenzie<sup>2</sup>, Tyson E. Graber<sup>2</sup>, Shen Wan<sup>1</sup>, Robert Delatolla<sup>1</sup>

6 1: Department of Civil Engineering, University of Ottawa, Ottawa, Canada, K1N 6N5

7 2: Children's Hospital of Eastern Ontario Research Institute, Ottawa, Canada, K1H 8L1

8

9 Corresponding author:

10 Dr. Robert Delatolla

11 Professor

12 Work E-mail: [robert.delatolla@uOttawa.ca](mailto:robert.delatolla@uOttawa.ca)

## 13 **Abstract**

14            Recurrent epidemics of influenza infection and its pandemic potential present a significant risk to global  
15 population health. To mitigate hospitalizations and death, local public health relies on clinical surveillance to locate and  
16 monitor influenza-like illnesses and/or influenza cases and outbreaks. At an international level, the global integration of  
17 clinical surveillance networks is the only reliable method to report influenza types and subtypes and warn of an  
18 emergent pandemic strain. During the COVID-19 pandemic, the demonstrated utility of wastewater surveillance (WWS)  
19 in complementing or even replacing clinical surveillance, the latter a resource-intensive enterprise, was predicated on  
20 the presence of stable viral fragments in wastewater. We show that influenza virus targets are stable in wastewaters  
21 and partitions to the solids fraction. We subsequently quantify, type, and subtype influenza virus in municipal  
22 wastewater and primary sludge throughout the course of a community outbreak. This research demonstrates the  
23 feasibility of applying influenza virus WWS to city and neighbourhood levels; showing a 17-day lead time in forecasting  
24 a citywide flu outbreak and providing population-level viral subtyping in near real-time using minimal resources and  
25 infrastructure.

## 26 1. Introduction

27 The World Health Organization (WHO) estimates that every year there are approximately 3,000,000 to  
28 5,000,000 severe influenza infections causing between 290,000 and 650,000 deaths around the world<sup>1</sup>. In Canada,  
29 influenza is estimated to be the cause of approximately 12,200 hospitalizations and 3,500 deaths every year, making  
30 this infectious disease amongst the top 10 leading causes of death in the country<sup>1,2</sup>. The significant impacts of seasonal  
31 and pandemic influenza on global health, particularly in the context of the potential deregulation of the traditional  
32 seasonality of respiratory pathogens after the onset of COVID-19 has created an urgent need for an improved  
33 surveillance of this disease. Standard clinical surveillance is resource intensive and often lags behind community  
34 outbreaks. Furthermore, clinical surveillance also often provides data with insufficient region-specificity on flu activity  
35 and viral subtyping<sup>3</sup>. Wastewater surveillance (WWS) of influenza, due to the localized and high-enrollment nature of  
36 the test, has the potential to support and complement clinical surveillance programs and strengthen health emergency  
37 response systems in a similar manner to the demonstrated benefits of WWS for poliovirus observed during the 20<sup>th</sup>  
38 century<sup>4,5</sup> and currently with the application of wastewater surveillance of SARS-CoV-2, the virus responsible for  
39 COVID-19, during the COVID-19 pandemic<sup>4,6-9</sup>. WWS of influenza has the potential to be an anonymous, aggregated,  
40 economical, and rapid monitoring tool that captures a significant portion of communities through involuntary  
41 contributions and hence an important option for public health units/agencies that requires further development.

42 The influenza virus is a single-stranded RNA virus of the Orthomyxoviruses class and is divided into types A,  
43 B, C, and D. Influenza A virus (IAV) and influenza B virus (IBV) types are typically associated with seasonal influenza  
44 endemic activity, however different subtypes of IAV are also responsible for influenza pandemics<sup>10,11</sup>. Shedding  
45 characterization of IAV and IBV suggests the possibility for a viable application of WWS to identify and monitor seasonal  
46 influenza outbreaks and future global influenza pandemics<sup>12</sup>. Previous studies have reported elevated fecal shedding  
47 rates of IAV and IBV of up to 6 log<sup>10</sup> copies/g<sup>13</sup>. In addition to high rates of shedding, infected individuals also maintain  
48 elevated fecal viral titers that are both higher and longer than that observed in detection periods of the virus in feces  
49 when compared to nasal swabs<sup>14,15</sup>.

50 Although IAV and IBV are fecally shed at a high rate, the virus is enveloped with an outer lipid membrane, and  
51 as a result, are often presumed to be present in low concentration in wastewater. Hence a thorough investigation of  
52 the partitioning of the influenza virus in wastewater and a subsequent optimized enrichment protocol of the influenza  
53 virus is required for the successful implementation of WWS. The hydrophobicity resulting from the outer lipid membrane

54 suggests that IAV and IBV shall partition to the solids fraction of the wastewater matrix. In general, there is limited  
55 success in detecting endogenous IAV and IBV RNA in wastewater and largely partitioning experiments have been  
56 limited to the investigation of spiked concentrations of viral surrogates to wastewaters<sup>16-18</sup>. The fate and behavior of  
57 endogenous influenza virus and the targeted RNA that is likely present in low concentrations in wastewater is expected  
58 to differ from a spiked viral surrogate within a wastewater matrix. In this regard, preliminary investigations by Wolfe et  
59 al.<sup>18</sup> recently hinted that RNA preferentially partitions to the solids fraction of wastewater compared to polyethylene  
60 glycol (PEG) precipitated supernatant, hence supporting the hypothesis of the disease target partitioning to the solids  
61 fraction of wastewater. As such, with the current knowledge of influenza partitioning in wastewater based predominantly  
62 on surrogate spiking experiments and on a single study based on endogenous IAV, additional partitioning studies  
63 performed on endogenous influenza virus in wastewater are necessary to optimize the enrichment of disease targets  
64 in the wastewater matrix and to apply influenza WWS within cities and neighbourhood communities.

65 Numerous studies of influenza virus in natural water sources have been undertaken to analyze the potential  
66 of oral influenza transmission pathways<sup>17,19,20</sup>. To date, only one study has outlined a protocol demonstrating the  
67 successful detection of influenza, IAV, in wastewaters<sup>18</sup>. This study recently demonstrated good agreement between  
68 wastewater measurements of IAV and reported clinical IAV cases observed as part of the Michigan University's campus  
69 surveillance program and Stanford University's athlete surveillance programs. However, a lack of information in regards  
70 to the quantification and trending of IAV WWS signal in cities and neighbourhood communities and most importantly  
71 the relation of the IAV signal in wastewater to clinical surveillance metrics. New information related to IAV WWS is  
72 hence required to elucidate complementary aspects of influenza virus WWS relative to clinical surveillance.

73 Furthermore, no studies to date demonstrate an ability for WWS to provide IAV subtyping information.  
74 Subtyping of IAV in wastewater is potentially especially useful to public health units/agencies to identify the  
75 presence/absence of IAV strains responsible for community disease during seasonal epidemic activity. Because IAV  
76 may undergo antigen shift or drift which favors pandemic-potential influenza features, it is of first importance to develop  
77 protocols and methodologies to subtype the virus in wastewater. Even with 18 hemagglutinin (H1 to H18) and 11  
78 neuraminidase (N1 to N11) subtypes being known to exist for IAV, the subtypes that routinely cause human infections  
79 today are restricted to two strains, H1N1 and H3N2<sup>11</sup>. As such, identification of which of these two subtypes are  
80 responsible for community disease, with each subtype being associated with distinct clinically relevant phenotypic  
81 characteristics, will further increase the impact of IAV WWS programs.

82           Upon this background, and with the goal of advancing influenza WWS, we first investigated the partitioning  
83 behavior of endogenous IAV in city and neighbourhood wastewater. The partitioning findings were used to optimize an  
84 enrichment protocol for the quantification of influenza RNA in wastewater and subsequently apply the protocol to  
85 quantitate wastewater IAV and IBV RNA at the citywide level as well as within three distinct neighbourhoods in Ottawa,  
86 Ontario, Canada. The wastewater viral signal was correlated with clinical case data available from the Ottawa public  
87 health unit/agency during an out-of-season outbreak, determining the benefits and complementary attributes of  
88 influenza virus WWS at the citywide and neighbourhood level. Finally, IAV positive citywide and neighbourhood  
89 wastewater were tested for H1N1 and H3N2 to identify the circulating subtype responsible for community disease. To  
90 the best of our knowledge, this study is the first to demonstrate the applicability of influenza virus WWS and subtyping  
91 at the citywide and neighbourhood-level during an influenza community outbreak and the relation of influenza virus  
92 WWS and influenza wastewater subtyping to clinical surveillance.

## 93   **2.    Methods**

### 94   **2.1. Site descriptions**

95           The wastewater samples collected in this study were harvested from the City of Ottawa’s Robert O. Pickard  
96 Environmental Centre, its sole water resource recovery facility (WRRF), which processes wastewater from  
97 approximately 910,000 individuals, or approximately 91% of the city’s population. In addition, wastewater samples were  
98 harvested from three manholes that enabled access to the city sewer collectors. These three sewer locations  
99 geographically isolate three distinct city neighbourhoods that were previously identified as vulnerable communities for  
100 COVID-19 due to the higher concentration of residents living and a higher percentage of residents working in  
101 congregate care settings (e.g., long-term care facilities). Further information about the sampling locations is provided  
102 in Table S1.

### 103   **2.2. Wastewater sample collection, enrichment, and nucleic acid extraction**

104           To obtain samples representative of the citywide viral load of IAV and IBV, hourly, 24-hour composite samples  
105 of primary clarified sludge were collected daily from the Ottawa WRRF between February 2, 2022, and May 24, 2022.  
106 To obtain samples representative of neighbourhood-level viral load of IAV and IBV, hourly, 24-hour composite municipal  
107 sewer wastewater samples were harvested two to three times a week from the studied neighbourhoods across the

108 same period. Upon collection, the primary sludge samples were immediately refrigerated at 4°C at the WRRF to await  
109 transport and were placed in coolers with ice packs for transport to the laboratory for analysis. Harvested  
110 neighbourhood samples were immediately placed in coolers with ice packs and transported to the laboratory where  
111 they were then allowed to settle for 60 minutes, followed by decanting to obtain settled solids. 40 mL of well-  
112 homogenized primary sludge (WRRF samples) or 40 mL of the settled solids (neighbourhood sewer samples) was  
113 centrifuged and 250 mg of pelleted material was then extracted using the RNeasy PowerMicrobiome (Qiagen)  
114 methodology as previously described by D'Aoust et al.<sup>21</sup>.

### 115 **2.3. Wastewater sample RT-qPCR analysis**

116 Measurements of IAV, IBV, pepper mild mottle virus (PMMoV), and SARS-CoV-2 were performed via  
117 singleplex RT-qPCR (Bio-Rad, Hercules, CA) using previously developed and described assays<sup>22–25</sup>. All primers and  
118 probes, PCR cycling conditions, and reagent concentrations are described in detail in Table S3. All samples were run  
119 in technical triplicates with non-template controls and 5-point standard curves prepared with an RT-ddPCR-quantified  
120 lab-propagated Hong Kong/1/68/MA/E2 (H3N2) strain of IAV (IAV positive control), and with the EDX RPPOS standard  
121 (Exact Diagnostics) (IBV positive control). The assay's limit of detection (ALOD) and quantification (ALQ) for IAV's M  
122 gene region were approximately 3.5 copies/reaction and 5.7 copies/reaction, respectively. PCR efficiency ranged from  
123 91–102% and R<sup>2</sup> values were greater than 0.98 (n = 10) throughout the study.

### 124 **2.4. Primary sludge and municipal wastewater fractionation experiments**

125 Primary sludge collected from the city of Ottawa and municipal wastewater collected from three Ottawa  
126 neighbourhoods were used to determine the fractionation of endogenous influenza RNA in these two wastewater  
127 matrices. As this study was performed during an outbreak of IAV activity in the city of Ottawa during the spring of 2022,  
128 the fractionation experiments were performed on IAV positive primary sludge and municipal wastewater samples. ). All  
129 replicates were subject to the same storage, transport, and holding times prior to the fractioning experiments. All  
130 fractions were extracted within 2 hours of the fractionation procedure.

131 Two 250 mL primary sludge samples were collected on different days and subsequently split into 3 biological  
132 replicates (n=6) and then separated into three fractions: settled solids, PEG-precipitated solids, and supernatant (Fig. 1  
133 A). To study primary sludge fractioning, samples were completely mixed, and 30 mL of sludge was collected and  
134 centrifuged at 10,000 x g for 45 minutes at 4°C. The supernatant was decanted and set aside, being careful to preserve

135 the pellet. Samples were again centrifuged (10,000xg, 10 minutes, 4°C) and the remaining supernatant was then  
136 decanted and set aside. The remaining pellet was then stored at 4°C until extraction. The pellet sample fraction was  
137 considered the settled solid fraction of the sample and was extracted using the RNeasy PowerMicrobiome Kit (Qiagen),  
138 as previously described by D'Aoust *et al.*<sup>8</sup>. The retained supernatant (~27 mL) was serially filtered through 30 kDa-15  
139 mL Amicon ultrafiltration cartridge (EMD Millipore) at 4,000 x g for 15 minutes at 4°C. This supernatant fraction was  
140 then extracted using the QIAamp Viral RNA Mini Kit (Qiagen) on a QIAcube Connect automated extraction platform as  
141 per the manufacturer's instructions. Finally, 30 mL of sludge was precipitated with a PEG 8000 solution at a final  
142 concentration of 80 g/L, 0.3M NaCl, and adjusted to a pH of 7.3, in a final volume of 40 mL. The samples were then  
143 mixed and incubated overnight at 4°C. The sample was then centrifuged at 10,000 x g for 45 minutes at 4°C. Samples  
144 were again centrifuged at 10,000 x g for 10 minutes at 4°C. The remaining pellet was then stored at 4°C until extraction.  
145 This sample fraction was considered the PEG-precipitated solids fraction of the sample and was extracted using the  
146 RNeasy PowerMicrobiome Kit (Qiagen), following previously described methodologies by D'Aoust *et al.*<sup>21</sup>.

147 To determine the fractionation of endogenous IAV in municipal wastewater, three 4.0 L municipal wastewater  
148 samples were collected on different days from the three neighbourhoods in Ottawa, split into 4 biological replicates

**Fig. 1 Schematic showing sample processing for the fractionation experiments of both types of tested wastewater**

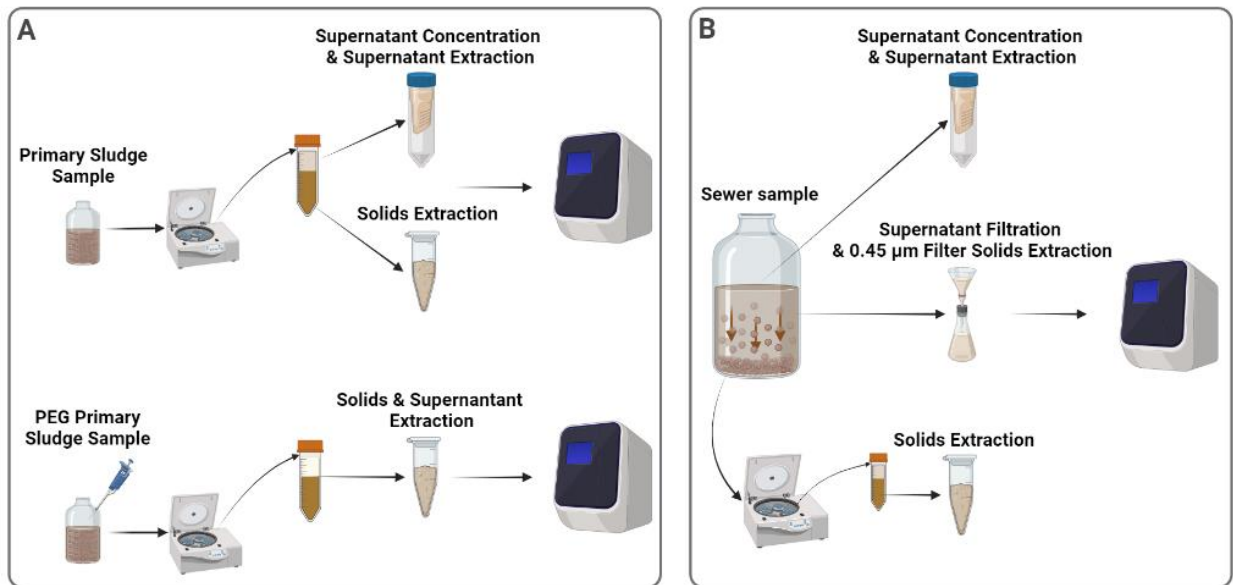

**A** Processing of primary clarified sludge samples to examine the fractionation of influenza A viral signal within the supernatant and solid pellet with and without PEG addition. **B** Processing of municipal wastewater to examine the fractionation of influenza A viral signal within the supernatant, filtered suspended solids and solid pellet.

149 (n=12), and subsequently separated into three fractions: settled solids, 0.45 µm filter solids, and supernatant (Fig. 1 B).  
150 For the municipal wastewater fractioning experiment, samples were settled for 2 hours at 4°C and then 40 mL of the  
151 settled solids were harvested and centrifuged at 10,000 x g for 45 minutes at 4°C. The supernatant was decanted and  
152 set aside, being careful to preserve the pellet. Samples were recentrifuged at 10,000 x g for 10 minutes at 4°C and the  
153 remaining supernatant was again set aside. The final pellet, which was considered the settled solid fraction, was stored  
154 at 4°C until extraction, using the RNeasy PowerMicrobiome Kit (Qiagen), as previously described by D'Aoust *et al.*<sup>8</sup>.  
155 Subsequently, 40 mL of the post-settling supernatant of each sample was serially filtered through the 30 kDa-15 mL  
156 Amicon cartridge at 4,000 x g for 15 minutes at 4°C to generate the supernatant fraction of the sample. This was  
157 extracted using the QIAamp Viral RNA Mini Kit (Qiagen) on a QIAcube Connect automated extraction platform as per  
158 the manufacturer's instructions. Finally, 500 mL of supernatant (post-settling) of each sample was serially filtered  
159 through a 1.5 µm glass fiber filter (GFF) followed by filtration through a 0.45 µm GF6 mixed cellulose ester (MCE) filter  
160 (EMD Millipore). 32 mL of elution buffer (0.05 M KH<sub>2</sub>PO<sub>4</sub>, 1.0 M NaCl, 0.1% (v/v) TritonX-100, pH 9.2) was then passed  
161 through the spent filters (1.5 µm and 0.45 µm). The resulting eluate, considered the 0.45 µm filter solids fraction of the  
162 sample, was captured and stored at 4°C until extraction using the RNeasy PowerMicrobiome Kit (Qiagen), as previously  
163 described methodologies by D'Aoust *et al.*<sup>8</sup>.

164 It should be noted that several enrichment methods were used in this study to partition the primary sludge and  
165 municipal wastewaters. In particular, the study applies PEG precipitation, filtration, and centrifugation, as these methods  
166 have been shown to appropriately concentrate enveloped viruses in wastewater<sup>26-36</sup>. In addition, it is noted that two  
167 RNA extraction kits were used to analyze the distinct solids fractions and the distinct liquid fractions of the primary  
168 sludge and municipal wastewater samples. The RNeasy PowerMicrobiome Kit (Qiagen) extraction kit was used to  
169 extract solids-rich fractions and has been previously demonstrated for the preferential extraction of viral RNA from  
170 solids. The QIAamp Viral RNA Mini Kit (Qiagen) extraction kit was used to extract liquid fractions and has been  
171 demonstrated for the preferential extraction of liquid fractions of wastewaters<sup>37-40</sup>.

172 The percentage of IVA gene copies partitioned to the primary sludge solids fraction was calculated by  
173 multiplying the gene copies measured in the extracted mass of solids by the ratio of the total mass of pelleted solids to  
174 the extracted mass. PEG precipitation was applied to the primary solids to calculate the viral signal present in the  
175 unsettled/suspended solids of the liquid fraction that were not detected by analyzing the liquid fraction alone. Thus, the  
176 IAV viral signal in the PEG-precipitated solids fraction was calculated by subtracting the IVA gene copies measured in  
177 the solids precipitated via the application of PEG from the IVA gene copies measured in the primary sludge solids



178 fraction without the application of PEG. Finally, the IVA gene copies in the primary sludge supernatant fraction were  
179 calculated by simply multiplying the gene copies measured in the extracted liquid phase by the ratio of the total liquid  
180 volume to the extracted volume. The total measurable endogenous IAV signal from the primary sludge samples was  
181 subsequently calculated by summing the IVA gene copy fractions. The partitioning of the total signal was expressed as  
182 the percentage of the total measurable signal of the fractions.

183 The amount of IVA gene copies in the municipal wastewater solids fraction was calculated by multiplying the  
184 gene copies measured in the extracted mass of solids by the ratio of the total mass of pelleted solids to the extracted  
185 mass. The IVA gene copies in the 0.45 µm filtered solids fraction and supernatant fraction was calculated by multiplying  
186 the gene copies measured in the extracted sample by the ratio of the total sample volume to extracted volume. The  
187 total measurable endogenous IAV signal from the municipal wastewater samples was calculated by adding the three  
188 IVA gene copy fractions together. The partitioning of the total signal was again expressed as a percentage of the total  
189 measurable signal.

## 190 **2.5. Clinical data**

191 All influenza clinical data was provided weekly by Ottawa Public Health. Influenza screening of patient clinical  
192 samples in Ottawa is performed via RT-PCR assays either at the regional or provincial level, depending on whether  
193 patient samples originate from hospital inpatient testing or institutional outbreaks, respectively. Testing criteria for  
194 influenza screening in Ontario include: i) pediatric (<18 years old) emergency room patients with respiratory infection  
195 symptoms, ii) all hospitalized inpatients showing signs and symptoms of respiratory infection, iii) patients showing signs  
196 and symptoms of respiratory infection in institutions where there has been a declared outbreak, and iv) patients showing  
197 signs and symptoms of respiratory infection in institutions where there has not been a declared outbreak<sup>41</sup>. Clinical  
198 samples of type 3 and 4, namely the institution patients' samples, are the only ones sent to Public Health Ontario  
199 Laboratories (PHOL) where they are typed and subtyped. All other samples are sent to the Eastern Ontario Regional  
200 Laboratory Association (EROLA) to be typed only.

## 201 **2.6. Statistical analyses**

202 Time-step Pearson's R correlation analyses were performed using Graphpad Prism (version 9.3.1) to evaluate  
203 the fit between observed IAV viral signal in wastewater and reported IAV clinical data obtained from the local public  
204 health unit (Ottawa Public Health) and to determine the lag/prediction period between observed IAV viral signal in

205 wastewater and reported IAV clinical cases at various times (0 to 21 days time-stepped). Normality of the data was  
206 established beforehand with a quantile-quantile plot to determine the validity of using Pearson's R correlation.

207 **3. Results**

208 **3.1.Partitioning of endogenous IAV virus in primary sludge and municipal**  
209 **wastewaters**

210 The city of Ottawa and its neighbourhoods experienced an uncommon seasonal outbreak of IAV activity in the  
211 spring of 2022. This IAV activity in the community also corresponded with a SARS-CoV-2 resurgence, with the two  
212 waves being likely initiated by the removal of the masking mandates in the city during the COVID-19 pandemic. IBV  
213 was not detected in clinical or wastewater samples in the city or the neighbourhoods during the resurgence of the viral  
214 diseases in the community. As such, endogenous IAV fractionation experiments were performed on primary sludge  
215 (citywide samples) and municipal wastewater (neighbourhood samples) as endogenous IBV primary sludge and  
216 municipal wastewater samples were unavailable.

217 In primary sludge, IAV was found to almost exclusively concentrate in the solids fraction; analysis of primary  
218 sludge detected  $88.1 \pm 10.6\%$  of the viral signal in the settleable solids with  $<0.1\%$  present in both PEG-precipitated  
219 solids and liquid fractions (Fig. 2A). Similar partitioning was observed in municipal wastewater;  $84.6 \pm 10.3\%$  of the  
220 viral signal was detected in the settleable solids,  $4.0 \pm 3.1\%$  was present in suspended solids larger than  $0.45 \mu\text{m}$   
221 (filtered), and  $<0.1\%$  found in the supernatant (Fig. 2B). These findings are in agreement with the only other modern  
222 study, similarly reporting an IAV tropism for settled solids in wastewater<sup>19</sup>. Based on the findings of the fractionation  
223 experiments performed for IAV, primary sludge, and municipal wastewater sample processing and viral signal

224 measurements for IAV in this study were exclusively performed using solids-optimized enrichment and extraction  
225 methodologies.

**Fig. 2 Results of fractionation experiments of IAV viral signal in wastewater**

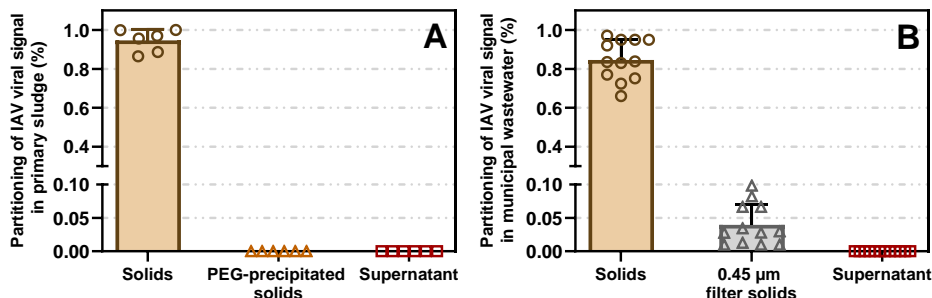

Partitioning of the measured endogenous IAV viral signal present in: **A** primary sludge (n=6); **B** municipal wastewater (n=12). Mean and standard deviation are displayed. Where the standard deviation is too small, the error bars are not displayed. Each measurement is done in 3 technical triplicates from each biological replicates.

### 226 **3.2. Surveillance of wastewater IAV & IBV RNA at the citywide level and in** 227 **neighbourhoods**

228 IAV was detected in 79 (60%) of the 131 samples tested, while IBV was detected in none. Sanger sequencing  
229 of PCR products confirmed the presence of IAV in primary sludge in samples from both WRRF and the three  
230 neighbourhoods sampled. Aligned sequences of the PCR products from primary sludge and municipal wastewater  
231 samples showed 92.5% and 98.1% homology with IAV (H3N2, Hong Kong/1/68/MA/E2 subtype), respectively.  
232 Meanwhile, SARS-CoV-2 viral signal above the limit of quantification<sup>21</sup> was detected in 123 out of the 131 samples  
233 tested (94%). IAV and SARS-CoV-2 signals were normalized using PMMoV signal to account for the human fecal  
234 content of the wastewater solids (Fig. 3). PMMoV has been recommended as a suitable normalizing factor enabling  
235 identification of trends in part due to stability in wastewater and low temporal variation in concentration, particularly  
236 when analyzing the solid fraction of wastewater<sup>8,24,42-47</sup>.

237 Mandated masking requirements in the province of Ontario, which were applied during the COVID-19  
238 pandemic, were largely lifted on March 21, 2022. The lifting of the mandate combined with a one-week student March  
239 break (ending March 21, 2022) coincided with a predictable increase in the 7-day average PMMoV-normalized  
240 concentration of SARS-CoV-2 along with the initiation of an IAV wave in the city (Fig. 3). The citywide IAV signal did  
241 not increase as markedly as SARS-CoV-2 during the same post-masking protection mandate resurgence. This

242 distinction between the rates of increase of IAV and SARS-CoV-2 signal in the city can likely be attributed to various  
 243 factors such as population susceptibility to the two diseases, transmissibilities of the diseases, incubation periods of  
 244 the diseases, and possible differences in degradation rates of the disease targets within the sewer system and within  
 245 primary sludge clarifiers. IAV typically has a shorter mean incubation period (2.0 days)<sup>48-50</sup> compared to ancestral  
 246 SARS-CoV-2 (6.4 days)<sup>51,52</sup>, parainfluenza (4.0 days)<sup>50</sup>, respiratory syncytial virus (5.0 days)<sup>50</sup>, SARS-CoV-2 Delta  
 247 variant (4.8 days)<sup>53,54</sup> and Omicron variant (3.6 days)<sup>53,54</sup>. Interestingly, the decline of both wastewater viral signals was  
 248 observed at a similar rate and ended on similar dates. The similarity in the trend may simply be due to the end of the  
 249 flu season coinciding with the exhaustion of Omicron BA.1 in the city of Ottawa. Alternatively, population-wide behavior  
 250 may have imparted a similar impact on the transmission of both viruses; regardless of which postulation is correct, the  
 251 observed overlap of the virus wastewater profiles argues against the phenomenon of viral interference, the presence  
 252 of one virus diminishing the spread of the other<sup>55</sup>.

**Fig. 3 Comparison of IAV and SARS-CoV-2 wastewater signals over time at the citywide level**

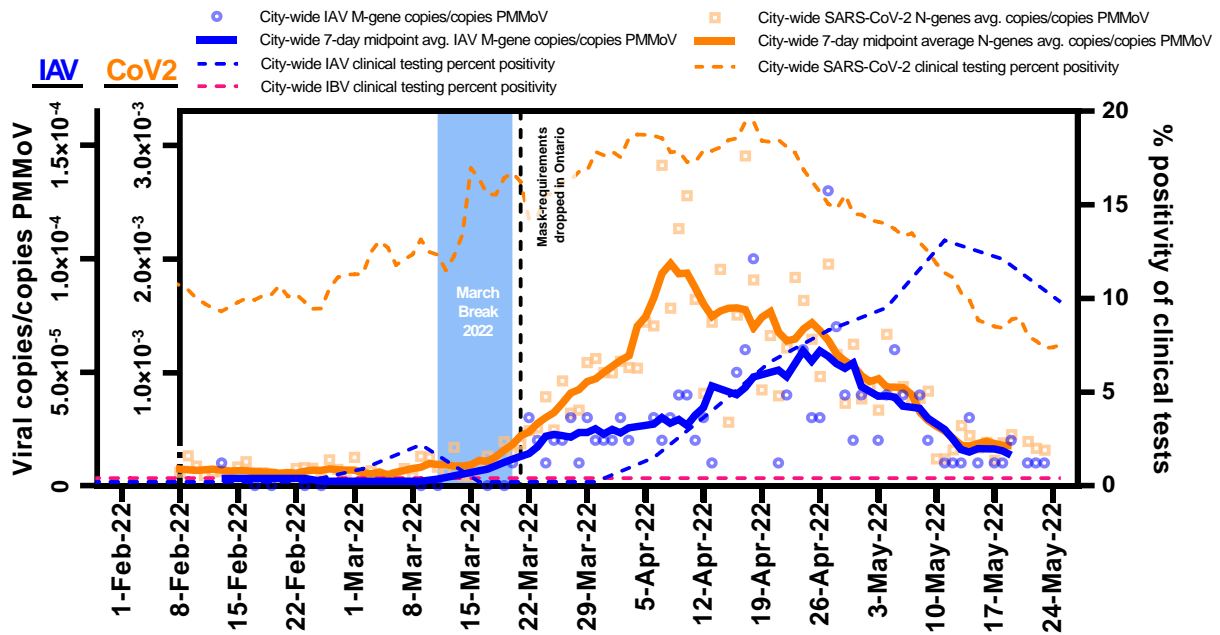

A comparison of both IAV and SARS-CoV-2 wastewater signals at the citywide level in Ottawa, from samples harvested from the city's WRRF. It was demonstrated that the detection of IAV in wastewater at the city-level (Feb. 13, 2022) occurred 17 days before the first clinical detection of IAV at any of the city's hospitals or clinics.

253 Citywide PMMoV-normalized IAV concentrations in primary sludge showed moderate to strong correlation  
 254 with weekly IAV clinical positivity rates (Pearson's  $r = 0.50$ ,  $p < 0.05$ ,  $n = 14$ ). It should be noted that this moderate to  
 255 strong correlation was observed without the application of a time-step shift applied to the IAV wastewater signal, which

256 visually precedes the clinical cases. A time-step correlation analysis revealed that when shifting the IAV wastewater  
 257 signal 17 days forward, the Person's R correlation between the wastewater signal and clinical data indeed increased  
 258 to a remarkably strong correlation ( $r = 0.97$ ,  $p < 0.05$ ,  $n = 14$ ). The identified overall lead time of the IAV wastewater  
 259 signal of 17 days was identified as the highest Person's R correlation compared to time-steps tested between 0 to 21  
 260 days. The specific lead times of WWS over clinical testing related to the first detection in the wastewater, outbreak  
 261 detection, peak, and resolution, ranged from 15–21 days (Table 1).

262 **Table 1 Lead time of normalized IAV viral RNA signal weekly IAV percent positivity**

| Outbreak progression       | Lead time of wastewater to clinical metric | Details                                                                                                                                             |
|----------------------------|--------------------------------------------|-----------------------------------------------------------------------------------------------------------------------------------------------------|
| <b>First detection</b>     | 17 days                                    | WWS: First identification of IAV in population.<br>Clinical: First identification of IAV in population.                                             |
| <b>Outbreak detection</b>  | 21 days                                    | WWS: First 3 consecutive days of increasing IAV viral signal<br>Clinical: First 2 consecutive weeks of increasing weekly percent positivity         |
| <b>Peak of outbreak</b>    | 15 days                                    | WWS: Date of highest 7-day midpoint avg. IAV viral signal<br>Clinical: Date of highest percent positivity                                           |
| <b>Outbreak resolution</b> | 17 days                                    | WWS: 7 consecutive days of decreasing 7-day midpoint avg. IAV viral signal<br>Clinical: 2 consecutive weeks of decreasing weekly percent positivity |

263 Several factors can explain the extensive lead time of WWS. First, IAV clinical testing in Ottawa, is regulated  
 264 by Public Health Ontario and typically prescribed when patients meet one of the four conditions described in the  
 265 methods are met: i) pediatric (<18 years old) emergency room patients with respiratory infection symptoms, ii) all  
 266 hospitalized inpatients showing signs and symptoms of respiratory infection, iii) patients showing signs and symptoms  
 267 of respiratory infection in institutions where there has been a declared outbreak, and iv) patients showing signs and  
 268 symptoms of respiratory infection in institutions where there has not been a declared outbreak<sup>41</sup>. Furthermore, the  
 269 clinical testing data is reported at the citywide level by the date of clinical testing and not by the onset of symptoms,  
 270 thus making it likely that fecal shedding of viral RNA could begin before individuals begin seeking medical treatment  
 271 and being clinically tested. Additionally, due to the well-documented spread of many diseases in younger children in  
 272 early-childcare centers and schools<sup>56–59</sup>, IAV can likely infect large numbers of individuals (young children and their  
 273 parents) relatively undetected by current clinical surveillance, before transitioning to more vulnerable population groups  
 274 (e.g., the elderly, sick or immunocompromised individuals) who may find themselves in greater need of medical  
 275 treatment, and more likely to undergo clinical testing. Overall, this demonstrates that WWS more accurately reflects the  
 276 onset of illness in the studied community compared to clinical surveillance and hence WWS can serve as an invaluable  
 277 adjunct to clinical surveillance, informing the implementation of appropriate public health and patient management  
 278 strategies.

279 Three neighbourhoods were also monitored for both IAV and SARS-CoV-2 viral signals in wastewater (Fig. 4).  
280 The neighbourhoods and their sewershed characteristics are described in greater detail in Table S1. At the  
281 neighbourhood level, peaks of both IAV and SARS-CoV-2 viral signals were observed earliest in neighbourhood #1  
282 compared to the other neighbourhoods and compared to the citywide signal. The mean age of residents was  
283 significantly lower in this community (approximately 10 years younger) as compared to the other two neighbourhoods  
284 or compared to the city of Ottawa at large. It is hypothesized that the lower mean age of this neighbourhood could  
285 indicate the presence of more children, which could have contributed to an earlier transmission of IAV, allowing IAV  
286 viral signal in wastewater to peak in this neighbourhood before others or before the city's WRRF, particularly in the  
287 context of lower vaccination rates for young children<sup>60</sup>. This neighbourhood saw significantly more elevated viral signal  
288 levels for both IAV and SARS-CoV-2 on several occasions, supporting the idea that more in-community transmission  
289 of both viruses was occurring during the studied period. The IAV viral signal in neighbourhood #2 did not appear to  
290 deviate significantly from the citywide signal observed in primary sludge. Coincidentally, this neighbourhood is  
291 characterized by a population age and number of households closest to the citywide average, perhaps hinting at a  
292 similar population distribution. The onset of the IAV outbreak in this neighbourhood was first detected on March 16,  
293 2022, which was after the first detection of clinical cases of IAV at the city-wide level. The most elevated PMMoV-  
294 normalized IAV viral signal was observed in neighbourhood #3. It is hypothesized that because neighbourhood #3 has  
295 both the highest population and the fewest number of households of all studied neighbourhoods (Table S1), more  
296 congregate living situations may exist, which could have led to more community transmission of IAV, a trend often  
297 observed in locations experiencing higher population density<sup>61-63</sup>. Overall, these findings illustrate that detecting both  
298 IAV and potentially IBV in sewage samples collected from local, smaller geo-spatial areas may be used as an effective  
299 and economical strategy to track the timing, location, and magnitude of influenza activity outbreaks.

Fig. 4 Comparison of IAV and SARS-CoV-2 wastewater signals over time at the neighbourhood level

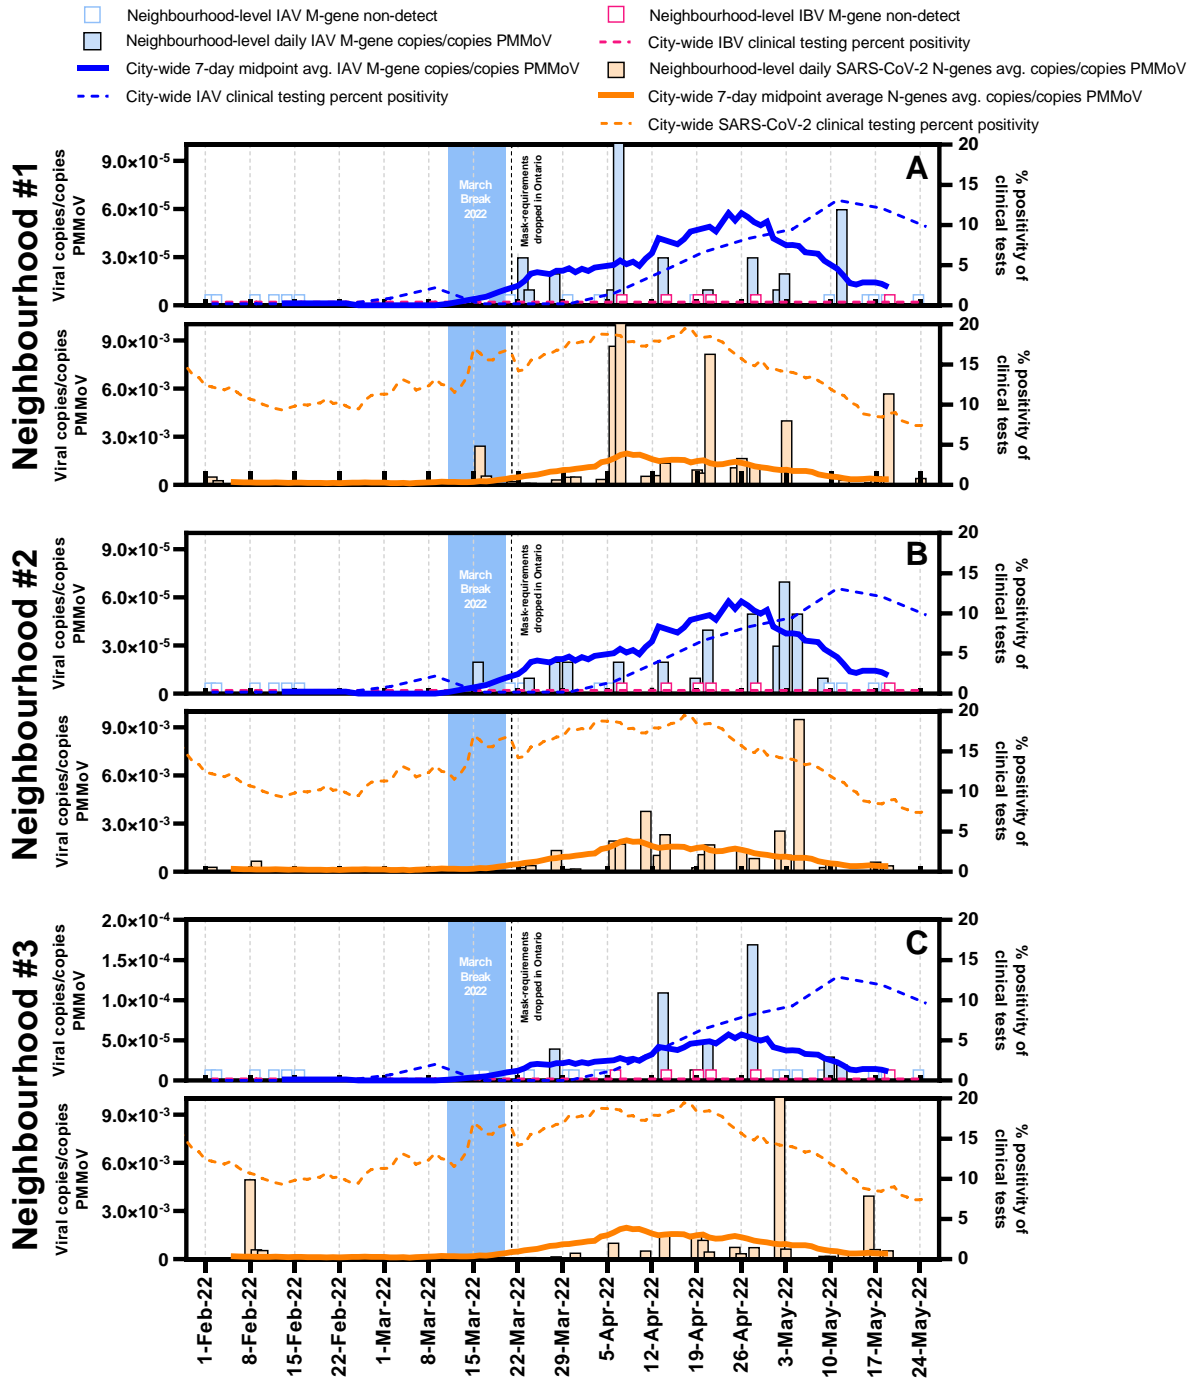

A comparison of both IAV and SARS-CoV-2 wastewater signals at the neighbourhood level in Ottawa, from samples harvested from the sewer system. It was demonstrated that the normalized IAV viral signal differed between neighbourhood and with the citywide signal when population characteristic differed.



### 301 **3.3. Subtyping of wastewater IAV RNA at the citywide level and in neighbourhoods**

302           During the spring of 2022, the city of Ottawa experienced its first seasonal outbreak of influenza since the  
303 beginning of the COVID-19 pandemic. Through wastewater surveillance and clinical testing, it was determined that this  
304 outbreak was caused exclusively by IAV, and no IBV viral signal was detected in the wastewater or clinical samples.  
305 As such, the wastewater samples were retrospectively subtyped for IAV and hence screened for H1N1 and H3N2 at a  
306 rate of 1 sample per week. H3N2 was found to be the circulating IAV subtype in both the neighbourhoods and city-level  
307 samples, with no detection of H1N1. H3N2 was identified at the citywide level in the primary sludge sample via RT-  
308 qPCR on February 13, 2022, 17 days earlier than the appearance of the first clinical IAV case or the subsequent clinical  
309 subtyping of the virus. In Eastern Ontario, only two out of the four eligible sample categories, samples collected from  
310 the first four patients of an institution with a respiratory illness outbreak and samples from patients in institutions, not in  
311 an outbreak, are sent to Public Health Ontario Laboratories (PHOL) where they are typed and subtyped for H1 and H3.  
312 At the peak of the 2022 Ottawa influenza testing, those samples represented only 18% of all tests performed. The  
313 remaining 82% of performed tests corresponded to samples collected from symptomatic hospitalized patients or  
314 symptomatic children admitted to the ER, which were sent to the Eastern Ontario Regional Laboratory Association  
315 (EROLA) where they are only typed for IAV or IBV. As a result, IAV subtyping via RT-qPCR WWS is near real-time and  
316 uses minimal resources and infrastructure creating unique opportunities for additional support of public health  
317 units/agencies to aid traditional clinical surveillance.

318 **4. Acknowledgements**

319 The authors wish to acknowledge the help and assistance of the University of Ottawa, the Ottawa Hospital,  
320 the Children's Hospital of Eastern Ontario, the Children's Hospital of Eastern Ontario's Research Institute, Public Health  
321 Ontario, and all their employees involved in the project. The authors also wish to thank Dr. Earl Brown for providing the  
322 influenza virus stock. Their time, facilities, resources, and feedback are greatly appreciated.

323 **5. Competing interests**

324 The authors declare that no known competing financial interests or personal relationships could appear to  
325 influence the work reported in this manuscript.

326 **6. Funding**

327 This research was supported by the Province of Ontario's Wastewater Surveillance Initiative (WSI). This  
328 research was also supported by a CHEO (Children's Hospital of Eastern Ontario) CHAMO (Children's Hospital  
329 Academic Medical Organization) grant, awarded to Dr. Alex E. MacKenzie.

## 330 7. References

- 331 1. World Health Organization. Up to 650 000 people die of respiratory diseases linked to seasonal flu each year.  
332 [https://www.who.int/news/item/13-12-2017-up-to-650-000-people-die-of-respiratory-diseases-linked-to-](https://www.who.int/news/item/13-12-2017-up-to-650-000-people-die-of-respiratory-diseases-linked-to-seasonal-flu-each-year)  
333 [seasonal-flu-each-year](https://www.who.int/news/item/13-12-2017-up-to-650-000-people-die-of-respiratory-diseases-linked-to-seasonal-flu-each-year) (2018).
- 334 2. Infection Prevention and Control Canada. Seasonal Influenza, Avian Influenza and Pandemic Influenza.  
335 <https://ipac-canada.org/influenza-resources> (2014).
- 336 3. Rolfes, M. A. *et al.* Annual estimates of the burden of seasonal influenza in the United States: A tool for  
337 strengthening influenza surveillance and preparedness. *Influenza Other Respi. Viruses* **12**, 132–137 (2018).
- 338 4. Ahmed, W. *et al.* First confirmed detection of SARS-CoV-2 in untreated wastewater in Australia: A proof of  
339 concept for the wastewater surveillance of COVID-19 in the community. *Sci. Total Environ.* **728**, 138764 (2020).
- 340 5. Metcalf, T. G., Melnick, J. L. & Estes, M. K. Environmental virology: From detection of virus in sewage and  
341 water by isolation to identification by molecular biology - A trip of over 50 years. *Annu. Rev. Microbiol.* **49**, 461–  
342 487 (1995).
- 343 6. Kumar, M. *et al.* First proof of the capability of wastewater surveillance for COVID-19 in India through detection  
344 of genetic material of SARS-CoV-2. *Sci. Total Environ.* **709**, 141326 (2020).
- 345 7. Peccia, J. *et al.* Measurement of SARS-CoV-2 RNA in wastewater tracks community infection dynamics. *Nat.*  
346 *Biotechnol.* **38**, 1164–1167 (2020).
- 347 8. D'Aoust, P. M. *et al.* Quantitative analysis of SARS-CoV-2 RNA from wastewater solids in communities with  
348 low COVID-19 incidence and prevalence. *Water Res.* **188**, 116560 (2021).
- 349 9. Randazzo, W. *et al.* SARS-CoV-2 RNA in wastewater anticipated COVID-19 occurrence in a low prevalence  
350 area. *Water Res.* **181**, (2020).
- 351 10. Hutchinson, E. C. Influenza Virus. *Trends Microbiol.* **26**, 809–810 (2018).
- 352 11. Centers for Disease Control and Prevention. Types of Influenza Viruses | CDC. *Cdc.Gov*  
353 <https://www.cdc.gov/flu/about/viruses/types.htm> (2019).
- 354 12. Minodier, L. *et al.* Prevalence of gastrointestinal symptoms in patients with influenza, clinical significance, and  
355 pathophysiology of human influenza viruses in faecal samples: What do we know? *Viol. J.* **12**, 1–9 (2015).
- 356 13. Arena, C. *et al.* Simultaneous investigation of influenza and enteric viruses in the stools of adult patients  
357 consulting in general practice for acute diarrhea. *Viol. J.* **9**, (2012).
- 358 14. Hirose, R. *et al.* Long-term detection of seasonal influenza RNA in faeces and intestine. *Clin. Microbiol. Infect.*  
359 **22**, 813.e1-813.e7 (2016).
- 360 15. Al Khatib, H. A. *et al.* Molecular and biological characterization of influenza A viruses isolated from human fecal  
361 samples. *Infect. Genet. Evol.* **93**, 104972 (2021).
- 362 16. Kevill, J. L. *et al.* Assessment of two types of passive sampler for the efficient recovery of SARS-CoV-2 and  
363 other viruses from wastewater. *Sci. Total Environ.* **838**, 156580 (2022).
- 364 17. Heijnen, L. & Medema, G. Surveillance of influenza A and the pandemic influenza A (H1N1) 2009 in sewage  
365 and surface water in the Netherlands. *J. Water Health* **9**, 434–442 (2011).
- 366 18. Wolfe, M. K. *et al.* Wastewater-based detection of an influenza outbreak. *medRxiv* 2022.02.15.22271027  
367 (2022) doi:10.1101/2022.02.15.22271027.
- 368 19. Deboosere, N. *et al.* Development and validation of a concentration method for the detection of influenza a  
369 viruses from large volumes of surface water. *Appl. Environ. Microbiol.* **77**, 3802–3808 (2011).
- 370 20. Lebarbenchon, C. *et al.* Viral replication, persistence in water and genetic characterization of two influenza a  
371 viruses isolated from surface lake water. *PLoS One* **6**, (2011).
- 372 21. D'Aoust, P. M. *et al.* COVID-19 wastewater surveillance in rural communities: Comparison of lagoon and  
19

373 pumping station samples. *Sci. Total Environ.* **801**, 149618 (2021).

374 22. CDC. Research Use Only CDC Influenza SARS-CoV-2 ( Flu SC2 ) Multiplex Assay Primers and Probes. **2**, 2–  
375 4 (2021).

376 23. Corpuz, M. V. A. *et al.* Viruses in wastewater: occurrence, abundance and detection methods. *Sci. Total*  
377 *Environ.* **745**, 140910 (2020).

378 24. Wolfe, M. K. *et al.* Scaling of SARS-CoV-2 RNA in Settled Solids from Multiple Wastewater Treatment Plants  
379 to Compare Incidence Rates of Laboratory-Confirmed COVID-19 in Their Sewersheds. *Environ. Sci. Technol.*  
380 *Lett.* (2021) doi:10.1021/acs.estlett.1c00184.

381 25. Haramoto, E. *et al.* Occurrence of pepper mild mottle virus in drinking water sources in Japan. *Appl. Environ.*  
382 *Microbiol.* **79**, 7413–7418 (2013).

383 26. Ahmed, W. *et al.* Comparison of virus concentration methods for the RT-qPCR-based recovery of murine  
384 hepatitis virus, a surrogate for SARS-CoV-2 from untreated wastewater. *Sci. Total Environ.* **739**, 139960 (2020).

385 27. Pérez-Cataluña, A. *et al.* Comparing analytical methods to detect SARS-CoV-2 in wastewater. *Sci. Total*  
386 *Environ.* **758**, (2021).

387 28. Pecson, B. M. *et al.* Reproducibility and sensitivity of 36 methods to quantify the SARS-CoV-2 genetic signal  
388 in raw wastewater: findings from an interlaboratory methods evaluation in the U.S. *Environ. Sci. Water Res.*  
389 *Technol.* (2021) doi:10.1039/d0ew00946f.

390 29. Philo, S. E. *et al.* A comparison of SARS-CoV-2 wastewater concentration methods for environmental  
391 surveillance. *Sci. Total Environ.* **760**, 144215 (2021).

392 30. Kantor, R. S., Nelson, K. L., Greenwald, H. D. & Kennedy, L. C. Challenges in Measuring the Recovery of  
393 SARS-CoV-2 from Wastewater. *Environ. Sci. Technol.* **55**, 3514–3519 (2021).

394 31. Zheng, X. *et al.* Comparison of virus concentration methods and RNA extraction methods for SARS-CoV-2  
395 wastewater surveillance. *Sci. Total Environ.* **824**, 153687 (2022).

396 32. Torii, S., Furumai, H. & Katayama, H. Applicability of polyethylene glycol precipitation followed by acid  
397 guanidinium thiocyanate-phenol-chloroform extraction for the detection of SARS-CoV-2 RNA from municipal  
398 wastewater. *Sci. Total Environ.* **756**, 143067 (2021).

399 33. Palmer, E. J. *et al.* Development of a reproducible method for monitoring SARS-CoV-2 in wastewater. *Sci.*  
400 *Total Environ.* **799**, 149405 (2021).

401 34. Whitney, O. N. *et al.* Sewage, Salt, Silica, and SARS-CoV-2 (4S): An Economical Kit-Free Method for Direct  
402 Capture of SARS-CoV-2 RNA from Wastewater. *Environ. Sci. Technol.* **55**, 4880–4888 (2021).

403 35. Canadian Water Network (CWN). *Phase I Inter-Laboratory Study: Comparison of approaches to quantify*  
404 *SARS-CoV-2 RNA in wastewater.* [https://cwn-rce.ca/covid-19-wastewater-coalition/phase-1-inter-laboratory-](https://cwn-rce.ca/covid-19-wastewater-coalition/phase-1-inter-laboratory-study)  
405 *study* (2020).

406 36. Nalla, A. K. *et al.* Comparative performance of SARS-CoV-2 detection assays using seven different primer-  
407 probe sets and one assay kit. *J. Clin. Microbiol.* **58**, 1–6 (2020).

408 37. Corpuz, M. V. A. *et al.* Viruses in wastewater: occurrence, abundance and detection methods. *Sci. Total*  
409 *Environ.* **745**, 140910 (2020).

410 38. Ahmed, W. *et al.* Surveillance of SARS-CoV-2 RNA in wastewater: Methods optimization and quality control  
411 are crucial for generating reliable public health information. *Curr. Opin. Environ. Sci. Heal.* **17**, 82–93 (2020).

412 39. Barril, P. A. *et al.* Evaluation of viral concentration methods for SARS-CoV-2 recovery from wastewaters. *Sci.*  
413 *Total Environ.* **756**, 144105 (2021).

414 40. Feng, S. *et al.* Evaluation of Sampling, Analysis, and Normalization Methods for SARS-CoV-2 Concentrations  
415 in Wastewater to Assess COVID-19 Burdens in Wisconsin Communities. *ACS ES&T Water* **1**, 1955–1965  
416 (2021).

417 41. Public Health Ontario. Respiratory Viruses (including influenza) | Public Health Ontario.  
418 [https://www.publichealthontario.ca/en/laboratory-services/test-information-index/virus-respiratory.](https://www.publichealthontario.ca/en/laboratory-services/test-information-index/virus-respiratory)

- 419 42. D'Aoust, P. M. *et al.* Catching a resurgence: Increase in SARS-CoV-2 viral RNA identified in wastewater 48 h  
420 before COVID-19 clinical tests and 96 h before hospitalizations. *Sci. Total Environ.* **770**, (2021).
- 421 43. Verily Life Sciences. *Detection of SARS-CoV-2 in wastewater is an efficient and scalable approach for*  
422 *community infection monitoring.* (2021).
- 423 44. Bivins, A. *et al.* Within- and between-Day Variability of SARS-CoV-2 RNA in Municipal Wastewater during  
424 Periods of Varying COVID-19 Prevalence and Positivity. *ACS ES&T Water* acsestwater.1c00178 (2021)  
425 doi:10.1021/acsestwater.1c00178.
- 426 45. Nagarkar, M. *et al.* SARS-CoV-2 monitoring at three sewersheds of different scales and complexity  
427 demonstrates distinctive relationships between wastewater measurements and COVID-19 case data. *Sci. Total*  
428 *Environ.* **816**, 151534 (2022).
- 429 46. Zhan, Q. *et al.* Relationships between SARS-CoV-2 in Wastewater and COVID-19 Clinical Cases and  
430 Hospitalizations, with and without Normalization against Indicators of Human Waste. *ACS ES&T Water* (2022)  
431 doi:10.1021/acsestwater.2c00045.
- 432 47. LaTurner, Z. W. *et al.* Evaluating recovery, cost, and throughput of different concentration methods for SARS-  
433 CoV-2 wastewater-based epidemiology. *Water Res.* **197**, 117043 (2021).
- 434 48. Wu, Z., Harrich, D., Li, Z., Hu, D. & Li, D. The unique features of SARS-CoV-2 transmission: Comparison with  
435 SARS-CoV, MERS-CoV and 2009 H1N1 pandemic influenza virus. *Rev. Med. Virol.* **31**, 1–11 (2021).
- 436 49. Adékambi, T. & Drancourt, M. Dissection of phylogenetic relationships among 19 rapidly growing  
437 *Mycobacterium* species by 16S rRNA, hsp65, sodA, recA and rpoB gene sequencing. *Int. J. Syst. Evol.*  
438 *Microbiol.* **54**, 2095–2105 (2004).
- 439 50. Lessler, J. *et al.* Incubation periods of acute respiratory viral infections: a systematic review. *Lancet Infect. Dis.*  
440 **9**, 291–300 (2009).
- 441 51. Elias, C., Sekri, A., Leblanc, P., Cucherat, M. & Vanhems, P. The incubation period of COVID-19: A meta-  
442 analysis. *Int. J. Infect. Dis.* **104**, 708–710 (2021).
- 443 52. Quesada, J. A. *et al.* Incubation period of COVID-19: A systematic review and meta-analysis. *Rev. Clínica*  
444 *Española (English Ed.)* **221**, 109–117 (2021).
- 445 53. Du, Z. *et al.* Shorter serial intervals and incubation periods in SARS-CoV-2 variants than the SARS-CoV-2  
446 ancestral strain. *J. Travel Med.* **5**, 1–3 (2022).
- 447 54. Grant, R. *et al.* Impact of SARS-CoV-2 Delta variant on incubation, transmission settings and vaccine  
448 effectiveness: Results from a nationwide case-control study in France. *Lancet Reg. Heal. - Eur.* **13**, 1–12  
449 (2022).
- 450 55. Piret, J. & Boivin, G. Viral Interference between Respiratory Viruses. *Emerg. Infect. Dis.* **28**, 273 (2022).
- 451 56. Weissman, J. B. *et al.* The role of preschool children and day-care centers in the spread of shigellosis in urban  
452 communities. *J. Pediatr.* **84**, 797–802 (1974).
- 453 57. Neuzil, K. M., Hohlbein, C. & Zhu, Y. Illness Among Schoolchildren During Influenza Season. *Arch. Pediatr.*  
454 *Adolesc. Med.* **156**, 986 (2002).
- 455 58. Musher, D. M. How Contagious Are Common Respiratory Tract Infections? *N. Engl. J. Med.* **348**, 1256–1266  
456 (2003).
- 457 59. Osterholm, M. T., Reves, R. R., Murph, J. R. & Pickering, L. K. Infectious diseases and child day care. *Pediatr.*  
458 *Infect. Dis. J.* **11**, 31–41 (1992).
- 459 60. COVID-19 Vaccination Dashboard - Ottawa Public Health. [https://www.ottawapublichealth.ca/en/reports-](https://www.ottawapublichealth.ca/en/reports-research-and-statistics/COVID-19_Vaccination_Dashboard.aspx)  
460 [research-and-statistics/COVID-19\\_Vaccination\\_Dashboard.aspx](https://www.ottawapublichealth.ca/en/reports-research-and-statistics/COVID-19_Vaccination_Dashboard.aspx).
- 461 61. Centers for Disease Control and Prevention (CDC). Respiratory syncytial virus activity - United States, July  
462 2007-June 2011. *MMWR Morb Mortal Wkly Rep.* **60**, 1203–1206 (2011).
- 463 62. Jones, K. E. *et al.* Global trends in emerging infectious diseases. *Nature* **451**, 990–993 (2008).

- 464 63. Smith, T. P. *et al.* Temperature and population density influence SARS-CoV-2 transmission in the absence of  
465 nonpharmaceutical interventions. *Proc. Natl. Acad. Sci. U. S. A.* **118**, (2021).  
466
